# Supplementary material
Source: Elsevier journal article supplement (https://www.sciencedirect.com/science/article/pii/S1138359320302598)
Supplement: mmc1 [file S1138359320302598:mmc1.docx]

Tabla. Definición de Variables

| **Hipertensión arterial (HTA)** | Se consideró hipertenso al paciente diagnosticado como tal, o que estuviera tomando medicación antihipertensiva. La medida de la presión arterial se realizó con el paciente sentado, después de 5 minutos de reposo, mediante 2 determinaciones y obteniendo la media, según indican las recomendaciones europeas del año 2013[[1]](#endnote-1) |
| --- | --- |
| **Diabetes Mellitus (DM)** | Se consideró diabético al paciente diagnosticado como tal, o que estuviera tomando medicación antidiabética[[2]](#endnote-2). |
| **Dislipemia** | Se consideró dislipémico al paciente diagnosticado como tal, o que estuviera tomando medicación hipolipemiante o si en la analítica se detectaban concentraciones de lípidos elevadas en función del riesgo cardiovascular del paciente: colesterol total ≥200 mg/dl, LDL ≥130 mg/dl, HDL <40 mg/dl en varones o <50 mg/dl en mujeres o triglicéridos ≥200 mg/dl, para pacientes con Riesgo Cardiovascular normal, o colesterol total ≥175 mg/dl, LDL ≥100 mg/dl, HDL <40 mg/dl en varones o <46 mg/dl en mujeres o triglicéridos ≥150 mg/dl, para pacientes con Riesgo Cardiovascular elevado[[3]](#endnote-3). |
| **Obesidad** | Se definió la obesidad como la existencia de un índice de masa corporal (IMC) ≥ 30 kg/m2, midiendo el peso y la talla en la visita de inclusión[[4]](#endnote-4) |
| **Obesidad abdominal** | Se define como la presencia del perímetro abdominal elevado (≥ 102 cm en varón y ≥ 88 cm en mujer) medido en el punto medio entre la cresta ilíaca y el reborde costal22 |
| **Síndrome metabólico (SM)** | De acuerdo a la definición armonizada del consenso internacional que requiere la presencia de tres de los cinco criterios siguientes: a) elevación de glucemia en ayunas (≥100 mg/dl) o recibir tratamiento antidiabético con insulina o antidiabéticos orales; b) elevación de la presión arterial sistólica ≥130 mmHg o diastólica ≥85 mmHg o recibir tratamiento farmacológico antihipertensivo; c) valores de cHDL < 40 mg/dl (varones) o < 50 mg/dl (mujeres); d) triglicéridos ≥150 mg/dl, y e) perímetro abdominal ≥102 cm (varones) o ≥88 cm (mujeres)[[5]](#endnote-5) |
| **Síndrome metabólico premórbido (SMP)** | Se definió en aquellos pacientes con SM excluyendo aquellos participantes que padecían DM (previamente diagnosticada o que presentaran cifras de glucemia en ayunas ≥126 mg/dl) o tenían antecedentes de ECV (se aceptó como previamente diagnosticada en quienes declararon haber padecido infarto agudo de miocardio, angina o ictus)[[6]](#endnote-6) |
| **Sedentarismo** | Se definió sedentarismo como la realización de una actividad física inferior a 30 min de paseo diario de intensidad moderada durante al menos 4 días, según la información obtenida a través de la anamnesis22 |
| **Tabaquismo** | Se define como fumador a aquella persona que refiere en el último mes previo a la inclusión en el protocolo consumir tabaco (cigarros, puros y pipa), al menos una unidad a lo largo del mes, y exfumador al paciente que no ha fumado en el último año. Se consideró fumador en proceso de abandono a aquel sujeto que no ha fumado en el último mes, pero no ha alcanzado el año sin consumo. Se consideró no fumador al que nunca ha fumado[[7]](#endnote-7). |
| **Alcoholismo** | Se consideró consumo de riesgo cuando en la entrevista clínica el paciente refería una ingesta por día superior a 4 unidades en los varones (40 g) y 3 unidades en las mujeres (30 g)[[8]](#endnote-8) |
| **Antecedentes familiares de ECV precoz** | Se consideró el antecedente familiar de ECV prematura cuando algún familiar de primer grado presentó un evento CV antes de los 55 años de edad, en caso de varón, o 60 años, en caso de mujer22. |
| **Enfermedad Cardiovascular** | Se estableció que un paciente presentaba cardiopatía isquémica cuando constase documentalmente en la historia clínica los antecedentes o diagnóstico de angor, infarto agudo de miocardio o que se le hubiese realizado algún tipo de revascularización coronaria22.  Se consideró que un paciente padecía una insuficiencia cardíaca, cuando constase en la historia clínica este antecedente22.  La enfermedad cerebro-vascular se definió cuando figuraba en la historia clínica el antecedente o diagnóstico de ictus hemorrágico, ictus isquémico, ataque isquémico transitorio (AIT), estenosis carotídea o se le hubiese practicado una intervención vascular sobre la arteria carótida por aterosclerosis de la misma22.  Se consideró que un paciente presentaba arteriopatía periférica o enfermedad arterial periférica (EAP) cuando el valor del índice tobillo brazo medido por el investigador era <0,9 en al menos un miembro, constase en la historia clínica el antecedente o hubiese sido sometido a algún tipo de revascularización en arterias de extremidades inferiores22. |
| **Nefropatía** | Se definió como la eliminación urinaria de albumina entre 30-300 mg/24 horas, y proteinuria la excreción de albúmina mayor de 300 mg/24 horas[[9]](#endnote-9).  Se estimó el filtrado glomerular según la fórmula CKD-EPI[[10]](#endnote-10). En base a esto, se clasificó la ERC en los siguientes estadíos:   - Estadio 1: FGe G1 con albuminuria aumentada A2 o A3. - Estadio 2: FGe G2 con albuminuria aumentada A2 o A3. - Estadio 3a: FGe G3a con normoalbuminuria A1 o albuminuria aumentada A2 o A3. - Estadio 3b: FGe G3b con normoalbuminuria A1 o albuminuria aumentada A2 o A3. - Estadio 4: FGe G4 con normoalbuminuria A1 o albuminuria aumentada A2 o A3. - Estadio 5: FGe G5 con normoalbuminuria A1 o albuminuria aumentada A2 o A3 |
| **Lesión de Órgano Subclínica** | Se registraron: la hipertrofia ventricular izquierda (HVI) que se estableció en base a la información suministrada por el investigador, pudiendo establecerse el diagnóstico por electrocardiograma (índice de Sokolow–Lyon index >3.5 mV; RaVL >1.1 mV; producto del voltaje de Cornell >244 mV*ms) y/o ecocardiograma (>115 g/m2, en varones; >95 g/m2, en mujeres); microalbuminuria, el ITB patológico, que se consideró con valores < 0,9, la presión de pulso > 60 mmHg en mayores de 65 años y el FGe 30-59 ml/min19. |
| **Riesgo Cardiovascular** | La estratificación de riesgo cardiovascular de los pacientes se realizó siguiendo las tablas SCORE para los países de bajo riesgo[[11]](#endnote-11), clasificando a los mismos en: muy alto, alto, moderado y bajo riesgo cardiovascular. |

Tabla. Definición de eventos incidentes

| **Evento** | **Definición** |
| --- | --- |
| FRCV incidentes | Para cualquier nuevo FRCV que se identifique en el seguimiento, se utilizarán los mismos criterios diagnósticos definidos en la Tabla 2 |
| Ictus | Ingreso hospitalario, registro documentado o fallecimiento por ictus isquémico, hemorragia cerebral o accidente isquémico transitorio |
| Fibrilación auricular | Ingreso hospitalario, registro documentado o fallecimiento que incluya la fibrilación auricular, paroxística, permanente o persistente. |
| Insuficiencia cardíaca | Ingreso hospitalario, registro documentado o fallecimiento que incluya la insuficiencia cardíaca, tanto con fracción de eyección reducida como preservada |
| Cardiopatía isquémica | Ingreso hospitalario, registro documentado o fallecimiento que incluya infarto agudo de miocardio, angina, revascularización coronaria por intervencionismo o cirugía coronaria |
| Enfermedad vascular periférica | Ingreso hospitalario, registro documentado o fallecimiento con diagnóstico nuevo de enfermedad arterial periférica |
| Retinopatía avanzada | Registro documentado por hemorragias o exudados de retina o presencia de papiledema. |
| Descompensación de cualquier FRCV | Ingreso hospitalario o fallecimiento que hayan sido motivados por la descompensación aguda de alguno de los FRCV previamente diagnosticados. |
| Deterioro de filtrado glomerular | Se considerará deterioro de la función renal cuando, a lo largo del seguimiento, el filtrado glomerular estimado muestre un descenso de 2 desviaciones estándar respecto al valor basal. |
| Aumento de albuminuria | Se considerará incremento de albuminuria cuando, a lo largo del seguimiento, se observe un incremento de 2 desviaciones estándar respecto al valor basal. |
| FRCV: factor de riesgo cardiovascular | |

1. Mancia G, Fagard R, Narkiewicz K, Redon J, Zanchetti A, Böhm M, et al. 2013 ESH/ESC guidelines for the management of arterial hypertension: the Task Force for the Management of Arterial Hypertension of the European Society of Hypertension (ESH) and of the European Society of Cardiology (ESC). Eur Heart J. 2013; 34: 2159-219 [↑](#endnote-ref-1)
2. Inzucchi SE, Bergenstal RM, Buse JB, Diamant M, Ferrannini E, Nauck M, et al.Management of hyperglycaemia in type 2 diabetes: a patient-centered approach. Position statement of the American Diabetes Association (ADA) and the European Association for the Study of Diabetes (EASD). Diabetologia. 2012; 55: 1577-96. [↑](#endnote-ref-2)
3. Reiner Z, Catapano AL, De Backer G, Graham I, Taskinen MR, Wiklund O, et al. ESC Committee for Practice Guidelines (CPG) 2008-2010 and 2010-2012 Committees. ESC/EAS Guidelines for the management of dyslipidaemias: the Task Force for the management of dyslipidaemias of the European Society of Cardiology (ESC) and the European Atherosclerosis Society (EAS). European Heart Journal. 2011; 32, 1769–1818 [↑](#endnote-ref-3)
4. The Fifth Joint Task Force of the European Society of Cardiology and Other Societies on Cardiovascular Disease Prevention in Clinical Practice (constituted by representatives of nine societies and by invited experts). European Guidelines on cardiovascular disease prevention in clinical practice (version 2012). Eur Heart J. 2012; 33:1635-701. [↑](#endnote-ref-4)
5. Alberti KGMM, Eckel RH, Grundy SM, Zimmet PZ, Cleeman JI, Donato KA, et al. Harmonizing the metabolic syndrome. A Joint Interm Statement of the International Diabetes Federation Task Force on Epidemiology and Prevention; National Heart, Lung and Blood Institute; American Heart Association; World Heart Federation; International Atherosclerosis Society; and International Association for the Study of Obesity. Circulation. 2009; 120: 1640–5. [↑](#endnote-ref-5)
6. Simmons RK, Alberti KG, Gale AM, Colagiuri S, Tuomilehto J, Qiao Q, et al. The metabolic syndrome: useful concept or clinical tool? Diabetologia. 2010; 53: 600–5. [↑](#endnote-ref-6)
7. World Health Organization. Tobacco or health: a global status report. Ginebra: World Health Organization; 1997. [↑](#endnote-ref-7)
8. Anderson P, Cremona A, Paton A, Turner C, Wallace P. The risk of alcohol. Addiction. 1993; 88: 1493–508. [↑](#endnote-ref-8)
9. Kidney Disease: Improving Global Outcomes (KDIGO) CKD Work Group. KDIGO 2012 clinical practice guideline for the evaluation and management of chronic kidney disease. Kidney Int Suppl 2013; 3: 1-150. [↑](#endnote-ref-9)
10. Matsushita K, Mahmodi BK, Woodward M, Emberson JM, Jafar JH, Jee SH, Polkinghorne KR, Skankar A, Smith DH, Tonelli M, Warnock DG, Wen CP, Coresh J, Gansewoort DG, Emmaljarn BR, Levey AS. Comparison of risk prediction using the CKD-EPI equation and the MDRD study equation for estimated glomerular filtration rate. JAMA 2012; 307: 1941–1951 [↑](#endnote-ref-10)
11. Conroy RM, Pyörälä K, Fitzgerald AP, Sans S, Menotti A, De Backer G, et al; SCORE project group. Estimation of ten-year risk of fatal cardiovascular disease in Europe: the SCORE project. Eur Heart J. 2003; 24: 987-1003. [↑](#endnote-ref-11)
